# Supplementary material
Source: Research Square preprint supplement (doi:10.21203/rs.3.rs-9067880/v1)
Supplement: Supplementary file 1 [file 5519b7ab584e0de5e2da6bc7.docx]

**Supplementary Information**

The comprehensive detection of hemoglobinopathy variants via long-read sequencing

Jiale Xiang1,2,3*, Jiguang Peng1*, Xiangzhong Sun1*, Chen Jiang1, Huiru Zhao1, Yaya Guo1, Haiyan Xu1, Shanshan Gu1, Haodong Ye1, Long You1, Xiaoyan Huang1, Shiping Chen1, Baosheng Zhu4#, Zhiyu Peng1,2,3#

1. *BGI Genomics, Shenzhen 518083, China*
2. *College of Life Sciences, University of Chinese Academy of Sciences, Beijing 100049, China*
3. *Hunan Provincial Key Laboratory of Regional Hereditary Birth Defects Prevention and Control, Changsha Hospital for Maternal & Child Health Care Affiliated to Hunan Normal University, Changsha, China.*
4. *Department of Medical Genetics, Yunnan Provincial Key Laboratory of Birth Defects and Genetic Diseases, NHC Key Laboratory of Healthy Birth and Birth Defect Prevention in Western China, The First People's Hospital of Yunnan Province & The Affiliated Hospital of Kunming University of Science and Technology, Kunming 650032, China.*

Jiale Xiang, Jiguang Peng and Xiangzhong Sun contributed equally to this study.

Correspondence: Zhiyu Peng, [pengzhiyu@bgi.com](mailto:pengzhiyu@bgi.com) and Baosheng Zhu, [bszhu@aliyun.com](mailto:bszhu@aliyun.com)

**Supplementary Table 1 Primers and amplicons of multiplex long PCR.**

| **Primer name** | **Sequence (5‘-3’)** | **Position (hg38)** |
| --- | --- | --- |
| A-1 | GTTTACCCATGTGGTGCCTCCAT | Chr16: 169269-169291 |
| A-2 | GCATGAGTCATCACACCTGGACAAT | Chr16: 178806-178830 |
| A-3 | GAGCGATCTGGGCTCTGTGTTCTC | Chr16: 165245-165277 |
| A-4 | GCACATGTGCTTTCCTCTTCGTCTTC | Chr16: 185947-185972 |
| A-5 | GATCTGAGGTGGCACACAAGCAT | Chr16: 146487-146509 |
| B-1 | CTGCGTGTGTGAGAATAATCAGAGT | Chr11: 5228685-5228709 |
| B-2 | CTTTGTAGGTCACTCAGGACTTGTT | Chr11: 5237748-5237772 |
| B-3 | TAGTTTGAACTCACCTCTGGTTACT | Chr11: 5236060-5236084 |
| B-4 | TGCTAGGGCTTACTGAAGTAATCAT | Chr11: 5200658-5200682 |
| B-5 | TTGTCTATTGCAGGTGTGTAGACAT | Chr11: 5112671-5112695 |
| B-6 | ACAGTCCCTGCCTCTTAAGAGTT | Chr11: 5255756-5255778 |
| B-7 | GCTCTTGGGTGTACAAGTTTTCCAT | Chr11: 5168742-5168766 |
| B-8 | AGAATTCTCAGGCATTGTCCACTGT | Chr11: 5131111-5131135 |

Chr, chromosome

**Supplementary Table 2 Summary of *HBA* variants and length of amplicons.**

| **#** | **Gene** | **Common CNV/SV Name** | **Forword Primer & Reverse Primer** | **Length of Amplicon（kb）** | **Comment** |
| --- | --- | --- | --- | --- | --- |
| 1 | *HBA* | *αα* | A-1&A-2 | 9.6 | Used to validate the effectiveness of the primers |
| 2 | *HBA* | *-α3.7I* | A-1&A-2 | 5.8 |
| 3 | *HBA* | *--SEA* | A-3&A-4 | 1.4 |
| 4 | *HBA* | *--THAI* | A-5&A-4 | 6.0 |
| 5 | *HBA* | *-α3.7 Ⅱ* | A-1&A-2 | 5.8 | / |
| 6 | *HBA* | *-α3.7 Ⅲ* | A-1&A-2 | 5.8 |
| 7 | *HBA* | *--JX* | A-1&A-4 | 3.7 |
| 8 | *HBA* | *-α11.1* | A-1&A-4 | 5.5 |
| 9 | *HBA* | *-α10.3* | A-1&A-4 | 6.4 |
| 10 | *HBA* | *-α9.7* | A-1&A-4 | 7.0 |
| 11 | *HBA* | *--AW* | A-1&A-4 | 8.5 |
| 12 | *HBA* | *-α5.7* | A-1&A-2 | 3.9 |
| 13 | *HBA* | *-αJS* | A-1&A-2 | 7.0 |
| 14 | *HBA* | *-αMAL3.5* | A-1&A-2 | 6.0 |
| 15 | *HBA* | *-α2.8* | A-1&A-2 | 6.7 |
| 16 | *HBA* | *--14.9* | A-3&A-4 | 5.8 |
| 17 | *HBA* | *--FIL* | A-5&A-4 | 8.8 |
| 18 | *HBA* | *--MED II* | A-5&A-4 | 9.5 |
| 19 | *HBA* | *--FIL II* | A-5&A-4 | 10.4 |
| 20 | *HBA* | *--27.2* | A-5&A-4 | 12.2 |
| 21 | *HBA* | *-α27.6* | A-5&A-2 | 4.7 |
| 22 | *HBA* | *-α21.9* | A-5&A-2 | 10.4 |
| 23 | *HBA* | *-α20.5* | A-5&A-2 | 16.8 |
| 24 | *HBA* | *-α7.9* | A-3&A-2 | 5.6 |
| 25 | *HBA* | *-α6.9* | A-3&A-2 | 6.7 |
| 26 | *HBA* | *--KOL* | A-5&A-4 | 6.1 |
| 27 | *HBA* | *--CAL* | A-5&A-4 | 7.0 |
| 28 | *HBA* | *--CAMPANIA* | A-5&A-4 | 8.6 |
| 29 | *HBA* | *--MEX3* | A-5&A-4 | 8.7 |
| 30 | *HBA* | *-α2.7* | A-1&A-2 | 6.9 |
| 31 | *HBA* | *-α6.3* | A-1&A-2 | 3.2 |
| 32 | *HBA* | *-α5.3* | A-3&A-2 | 8.3 |
| 33 | *HBA* | *-α5.2* | A-1&A-2 | 4.4 |
| 34 | *HBA* | *-α4.9* | A-1&A-2 | 4.7 |
| 35 | *HBA* | *-α4.2* | A-1&A-2 | 5.3 |
| 36 | *HBA* | *-α2.4* | A-1&A-2 | 7.2 |
| 37 | *HBA* | *--DANE* | A-5&A-4 | 8.6 |
| 38 | *HBA* | *--WH* | A-1& A-4 | 6.5 |
| 39 | *HBA* | *αααanti3.7* | A-1&A-2 | 13.3 |
| 40 | *HBA* | *αααanti4.2* | A-1&A-2 | 13.8 |
| 41 | *HBA* | *HKαα* | A-1&A-2 | 10.0 |
| 42 | *HBA* | *αααα* | A-1&A-2 | 18.0 |
| 43 | *HBA* | *Anti-HKαα* | A-1&A-2 | 9.3 |

CNV, copy number variation;

SV, structure variation.

**Supplementary Table 3 Summary of *HBB* variants and length of amplicons.**

| **#** | **Gene** | **Common CNV/SV Name** | **Forword Primer & Reverse Primer** | **Length of Amplicon（kb）** | **Comment** |
| --- | --- | --- | --- | --- | --- |
| 1 | *HBB* | *βN* | B-1&B-2 | 9.1 | Used to validate the effectiveness of the primers |
| 2 | *HBB* | *Taiwanese deletion* | B-1&B-2 | 6.1 |
| 3 | *HBB* | *3.5 kb deletion* | B-1& B-2 | 5.6 |
| 4 | *HBB* | *Hb Lepore-Leiden* | B-3&B-2 | 8.9 |
| 5 | *HBB* | *Thai deletion* | B-3&B-2 | 3.8 |
| 6 | *HBB* | *Sicilian (δβ)0* | B-3&B-2 | 3.1 |
| 7 | *HBB* | *Turkish (δβ)0* | B-3&B-2 | 8.8 |
| 8 | *HBB* | *Chinese Gy(AyδB)0* | B-6&B-7 | 8.2 |
| 9 | *HBB* | *HPFH-6* | B-6&B-7 | 7.8 |
| 10 | *HBB* | *SEA-HPFH* | B-3&B-4 | 8.0 |
| 11 | *HBB* | *Filipino deletion* | B-3&B-5 | 4.9 |
| 12 | *HBB* | *Sirirai Gy(AyôB)0* | B-6&B-8 | 6.7 |
| 13 | *HBB* | *Indian (Aγδβ)0 (inv)* | B-3&B-2 | 9.0 |
| 14 | *HBB* | *78.9 kb Gγ(Aγδβ)0 del* | B-6&B-7 | 3.2 | / |
| 15 | *HBB* | *49.3 kb Gγ(Aγδβ)0 Asian del* | B-6&B-4 | 5.8 |
| 16 | *HBB* | *Caucasian HPFH* | B-3&B-4 | 7.6 |
| 17 | *HBB* | *Hb Gγ-β Ulsan* | B-6&B-2 | 8.4 |
| 18 | *HBB* | *HPFH-7(Hb Kenya)* | B-6&B-2 | 13.4 |
| 19 | *HBB* | *East European (δβ)0* | B-3&B-2 | 7.3 |
| 20 | *HBB* | *8.2 kb deletion* | B-3&B-2 | 8.2 |
| 21 | *HBB* | *Asian Indian* | B-3&B-2 | 6.1 |
| 22 | *HBB* | *British* | B-3&B-2 | 9.0 |
| 23 | *HBB* | *Hb Lepore-Hong Kong* | B-3&B-2 | 9.1 |
| 24 | *HBB* | *Hb Lepore-Baltimore* | B-3&B-2 | 9.0 |
| 25 | *HBB* | *Hb Lepore-Boston-Washington* | B-3&B-2 | 9.0 |
| 26 | *HBB* | *Hb Lepore-ARUP* | B-3&B-2 | 9.0 |
| 27 | *HBB* | *Hb Lepore-Hollandia* | B-3&B-2 | 9.0 |
| 28 | *HBB* | *7.2 kb deletion* | B-3&B-2 | 9.2 |
| 29 | *HBB* | *4.9 Kb deletion* | B-3&B-2 | 11.6 |
| 30 | *HBB* | *Czech 4237 bp deletion* | B-3&B-2 | 12.2 |
| 31 | *HBB* | *Indian (4056 bp deletion)* | B-3&B-2 | 12.4 |
| 32 | *HBB* | *Kabylia deletion/insertion* | B-1&B-2 | 7.0 |
| 33 | *HBB* | *Croatian (1605 bp deletion)* | B-1&B-2 | 7.5 |
| 34 | *HBB* | *1393 bp deletion* | B-1&B-2 | 7.7 |
| 35 | *HBB* | *Afghan (909 bp deletion)* | B-1&B-2 | 8.2 |
| 36 | *HBB* | *125 bp deletion* | B-1&B-2 | 9.0 |
| 37 | *HBB* | *468 bp deletion* | B-1&B-2 | 8.7 |
| 38 | *HBB* | *619 bp deletion* | B-1&B-2 | 8.5 |

**Supplementary Table 4 Single nucleotide variants (SNV) of tested samples.**

| **SNV** | **Number of Test** | **Concordant Rate** |
| --- | --- | --- |
| **HBA** | **55** | **100.0%** |
| *HBA1:c.334G>T* | 1 | 100.0% |
| *HBA1:c.364G>A* | 10 | 100.0% |
| *HBA2:c.369C>G* | 12 | 100.0% |
| *HBA2:c.377T>C* | 4 | 100.0% |
| *HBA2:c.40G>T* | 1 | 100.0% |
| *HBA2:c.427T>C* | 11 | 100.0% |
| *HBA1:c.46G>C* | 2 | 100.0% |
| *HBA1:c.51G>C* | 1 | 100.0% |
| *HBA2:c.54delC* | 1 | 100.0% |
| *HBA1:c.84G>T* | 5 | 100.0% |
| *HBA2:c.95G>A* | 2 | 100.0% |
| *HBA1:c.178G>A* | 1 | 100.0% |
| *HBA1:c.223G>C* | 1 | 100.0% |
| *HBA2:c.275T>C* | 1 | **100.0%** |
| *HBA2:c.80C>A* | 1 | 100.0% |
| *HBA1:c.104T>G* | 1 | 100.0% |
| **HBB** | **151** | **100.0%** |
| *HBB:c.-79A>G* | 1 | 100.0% |
| *HBB:c.-81A>C* | 1 | 100.0% |
| *HBB:c.-122T>A* | 1 | 100.0% |
| *HBB:c.-136C>G* | 1 | 100.0% |
| *HBB:c.-78A>G* | 7 | 100.0% |
| *HBB:c.315+5G>C* | 1 | 100.0% |
| *HBB:c.315+1G>T* | 1 | 100.0% |
| *HBB:c.315+2del* | 1 | 100.0% |
| *HBB:c.316-197C>T* | 36 | 100.0% |
| *HBB:c.92+1G>T* | 3 | 100.0% |
| *HBB:c.*129T>A* | 5 | 100.0% |
| *HBB:c.48G>A* | 1 | 100.0% |
| *HBB:c.113G>A* | 1 | 100.0% |
| *HBB:c.165_177delTATGGGCAACCCT* | 1 | 100.0% |
| *HBB:c.208G>A* | 2 | 100.0% |
| *HBB:c.68A>C* | 1 | 100.0% |
| *HBB:c.188C>T* | 1 | 100.0% |
| *HBB:c.199A>G* | 1 | 100.0% |
| *HBB:c.170G>A* | 2 | 100.0% |
| *HBB:c.343C>A* | 1 | 100.0% |
| *HBB:c.85dupC* | 5 | 100.0% |
| *HBB:c.394C>A* | 1 | 100.0% |
| *HBB:c.217dupA* | 27 | 100.0% |
| *HBB:c.79G>A* | 5 | 100.0% |
| *HBB:c.126_129delCTTT* | 18 | 100.0% |
| *HBB:c.90C>T* | 8 | 100.0% |
| *HBB:c.52A>T* | 18 | 100.0% |

**Supplementary Figure S1. Electrophoresis results of target region in 0.8% agarose gel.**

**Supplementary Figure S2. The data on distribution of length of generated sequence.**
